# Supplementary material
Source: PubMed Central journal article supplement (PMC4682491)
Supplement: i1552-5783-56-13-7875-s01.pdf [file i1552-5783-56-13-7875-s01.pdf]

**Supplementary Table 1.** Main neurologic and MRI findings

| Pt # | Neurologic and Developmental Findings                       | MRI findings                                                                                                                                                                                                                                                                                                                    |
|------|-------------------------------------------------------------|---------------------------------------------------------------------------------------------------------------------------------------------------------------------------------------------------------------------------------------------------------------------------------------------------------------------------------|
| 1    | Developmental delay and hypotonia                           | Normal                                                                                                                                                                                                                                                                                                                          |
| 2    | Developmental delay and hypotonia, seizures, encephalopathy | Severe supratentorial, inferior cerebellar and vermis volume loss. Demyelination of the remaining supratentorial white matter and deep gray nuclei. Enlargement of the lateral and third ventricles with thinning of the corpus callosum and brainstem.                                                                         |
| 3    | Developmental delay                                         | NP                                                                                                                                                                                                                                                                                                                              |
| 4    | Normal                                                      | NP                                                                                                                                                                                                                                                                                                                              |
| 5    | Developmental delay                                         | Multiple foci of T1 and T2 shortening in the subcortical white matter of the bilateral frontal and parietal lobes and the left temporal lobe. Several of these foci demonstrate restricted diffusion and signal loss on susceptibility weighted imaging. Imaging appearance in keeping with white matter injury in the newborn. |
| 6    | Developmental delay                                         | Normal                                                                                                                                                                                                                                                                                                                          |
| 7    | Developmental delay                                         | NP                                                                                                                                                                                                                                                                                                                              |
| 8    | Developmental delay                                         | Bilateral focal periventricular defect between corpus and tail of caudate nucleus; mild, heterogenous hyperintensity of peritrigonal white matter on T2/Flair; limited cerebral and cerebellar volume loss                                                                                                                      |
| 9    | Normal                                                      | Normal                                                                                                                                                                                                                                                                                                                          |
| 10   | Developmental delay                                         | Mild prominence of ventricles sulci.                                                                                                                                                                                                                                                                                            |
| 11   | Developmental delay; autism spectrum disorder               | Mild prominence of the ventricular system with accompanying prominence of the frontoparietal extra-axial CSF spaces. Benign external hydrocephalus vs mild communicating hydrocephalus.                                                                                                                                         |

NP: not performed

**Supplementary Table 2.** Summary of laboratory findings.

| <b>Pt #</b> | <b>Age<br/>(range, years)</b> | <b>T HcY*</b> | <b>MMA*</b>       | <b>Met*</b> |
|-------------|-------------------------------|---------------|-------------------|-------------|
| 1           | 0.1 - 1.8                     | 47.2 ± 14.6   | 4129.7 ± 6385.1   | 31.0 ± 22.2 |
| 2           | 0.1 - 1.9                     | 43.6 ± 22.1   | 6534.7 ± 5738     | 17.5 ± 12.8 |
| 3           | 0.1 - 4.8                     | 45.5 ± 16.8   | 12202.8 ± 16116.6 | 78.6 ± 72.8 |
| 4           | 0.2 - 2.8                     | 13.3 ± 2.1    | 1838.9 ± 1726.7   | 23.8 ± 11.2 |
| 5           | 0.1 - 4.2                     | 48.9 ± 19.2   | 6752.7 ± 5708.3   | 18.8 ± 15.9 |
| 6           | 0.1 - 3.7                     | 67.5 ± 16.9   | 8464.6 ± 8534.9   | 30.8 ± 41.6 |
| 7           | 4.7 - 9.3                     | 58.8 ± 10.5   | 16890.3 ± 11779.6 | 28.4 ± 34.8 |
| 8           | na                            | na            | na                | na          |
| 9           | 6.1 - 10.8                    | 39.6 ± 7.0    | 8240.8 ± 3973.4   | 30.3 ± 12   |
| 10          | 10.7 - 15.1                   | 143.4 ± 11.3  | 23793.6 ± 5250.0  | 35.7 ± 24.2 |
| 11          | 4.7 - 15.9                    | 89.8 ± 16     | 25934 ± 6465.5    | 32.2 ± 21.3 |

\*Values are expressed as mean ± SD

na, not available; T HcY, total plasma homocystein; MMA, plasma methylmalonic acid; Met, plasma methionine.  
Reference range and units used: T HcY: 0.8 - 6.5 umol/L; MMA: 100 - 370 nmol/L; Met: 8 – 49 nmol/ml.
